# Supplementary material for: Exploring the crystallization-induced mesophase evolution in an olefin block copolymer through a rationally designed two-step isothermal crystallization strategy
Source: Royal Society of Chemistry journal article supplement (doi:10.1039/c5ce02237a), 2016-01-01
Supplement: c5ce02237a1.pdf [file c5ce02237a1.pdf]

**Electronic Supplementary Information Available for**

Explore the crystallization induced mesophase evolution in olefin block copolymer through a rationally designed two-step isothermal crystallization strategy

*Qinglong Zhang, Jiashu Fan and Jiachun Feng\**

*State Key Laboratory of Molecular Engineering of Polymers, Collaborative Innovation Center of Polymers and Polymer Composite Materials, Department of Macromolecular Science and Laboratory of Advanced Materials, Fudan University, Shanghai 200433, China.*

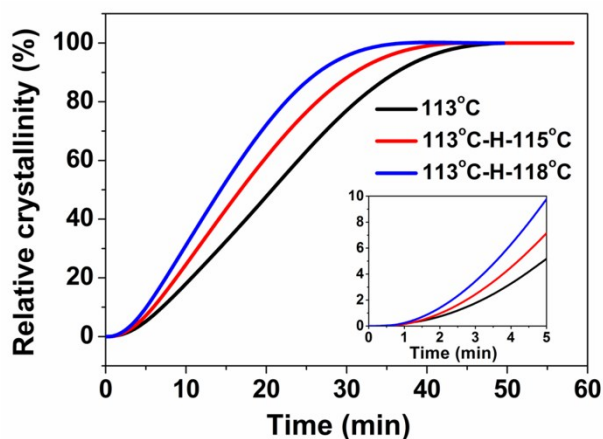

**Fig. S1.** DSC isothermal crystallization curves of three selected samples with significantly different crystallization rates. The initial process is amplified in the lower right corner.

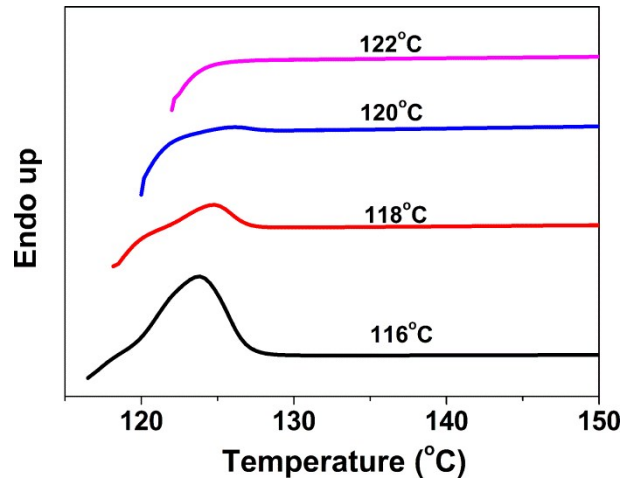

**Figure S2.** DSC melting curves of OBC after isothermally crystallized at different temperatures.

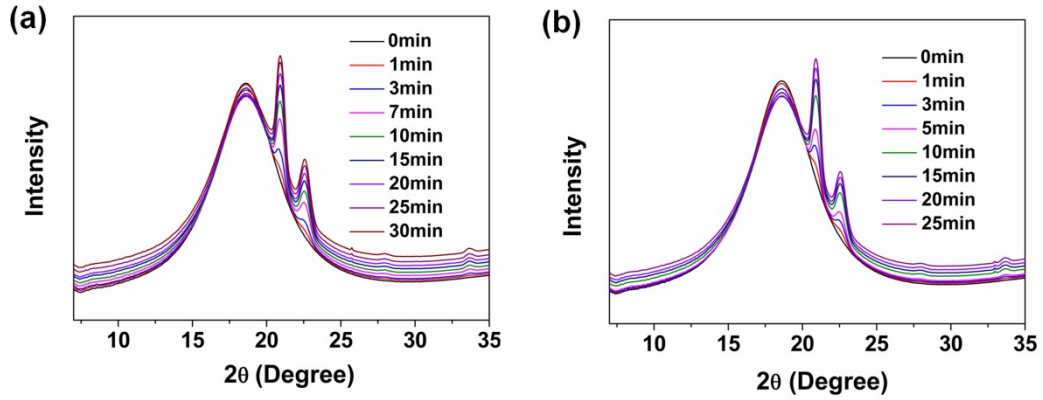

**Figure S3.** WAXS patterns of OBC isothermally crystallized at 116 °C for the first time (a) and OBC isothermally crystallized at 116 °C for the second time after melting (b).
